# Supplementary material
Source: PubMed Central journal article supplement (PMC4249519)
Supplement: AAC.03660-14_zac012143497so1.pdf [file AAC.03660-14_zac012143497so1.pdf]

**Table S1. Homology between the respective E9, A20 and D4 proteins of MCV and VV.**

|            | <b>Identity</b> | <b>Similarity</b> |
|------------|-----------------|-------------------|
| <b>E9</b>  | 53 %            | 72 %              |
| <b>A20</b> | 30 %            | 71 %              |
| <b>D4</b>  | 55 %            | 82 %              |

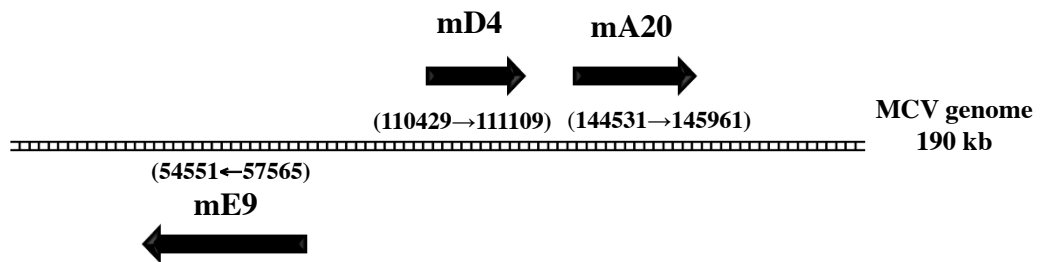

**FIG S1** The location of D4, A20 and E9 genes on the MCV genome. Indicated are the orientations (arrows) and the locations of the nucleotide coding regions (numbers) for the mD4 and mA20 processivity factors and the mE9 DNA polymerase on the MCV genome.

**A**

```

mD4 1 MLRERALRAAPHVLRYPHEDWEPVAEPLADAYAEVAPWLLRDRTEPAPERFFRQLELPLRD
vD4 1 MNSVTVSH-APYTITYHDDWEPVMSQLVEFYNEVASWLLRDETSPIPKFFIQLKQPLRN

mD4 61 KRVCIVGIDPYPEGATGVPFESPDFSKKTARALAAAAARAAEHGGCRRVSAYRNYDFRGV
vD4 60 KRVCVCGIDPYPKDGTGVPFESPNTKKSIKEIASSISRLTG-----VIDYKGYNLNII

mD4 121 QGVLAWNYLSCRRGETKSHAMHWERIARMLLAHIARFVRVYFLGRSDFGGVRAKLTAP
vD4 114 DGVIPWNYLSCKLGETKSHAIYWDKISKLLLOHITKHVSVLYCLGKTDFSNIRAKLESP

mD4 181 VTLLVGYHPAARGGQFESERTLEILNVLLELHGLAPVDWAQGFVPL 226
vD4 174 VTTIVGYHPAARDRQFEKDRSFEIINVLELDNKAPINWAQGFYI 218

```

**B**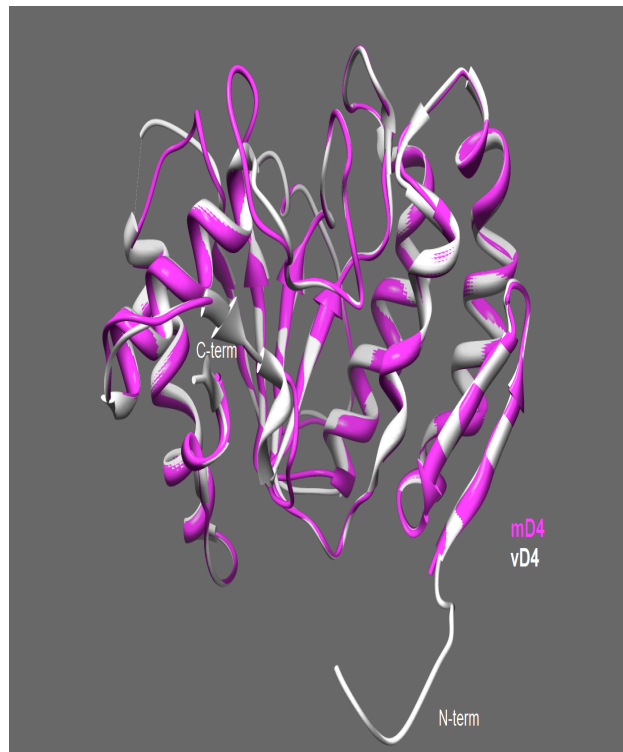

**FIG S2** (A) Alignment of mD4 and vD4. Identical amino acids are shaded. Missing amino acids are denoted by dashes. The C-terminal residues 167-180 and 191-206 of vD4 (underlined) are important for interacting with vA20. (B) Superimposition of mD4 predicted structure onto vD4 crystal structure. mD4 structure was generated by homology modeling using the SWISS-MODEL (1).

## REFERENCE

1. Arnold K, [Bordoli L](#), [Kopp J](#), [Schwede T](#). 2006. The SWISS-MODEL workspace: a web-based environment for protein structure homology modelling. *Bioinformatics* **22**:195-201.
